# Supplementary material for: New red–orange phosphorescent/electroluminescent cycloplatinated complexes of 2,6-bis(2′-indolyl)pyridine
Source: Royal Society of Chemistry journal article supplement (doi:10.1039/b201951e), 2002-01-01

## **New Red-orange Phosphorescent/Electroluminescent Cycloplatinated Complexes of 2,6-Bis(2'-indolyl)pyridine**

Qinde Liu,<sup>a</sup> Lisa Thorne<sup>a</sup>, Igor Kozin,<sup>a</sup> Datong Song,<sup>a</sup> Corey Seward,<sup>a</sup> Marie D'Iorio,<sup>b</sup>  
Ye Tao<sup>b,\*</sup> Suning Wang<sup>a\*</sup>

<sup>a</sup>Department of Chemistry, Queen's University, Kingston, Ontario, K7L 3N6, Canada

<sup>b</sup>Institute for Microstructural Science, National Research Council, Ottawa, K1A 0R6,  
Canada

1. A diagram showing the structure of the third independent molecule in the crystal lattice of **3**.
2. Molecular orbital diagrams for compounds 1-3.

The structure of the third independent molecule of compound **3** in the crystal lattice.

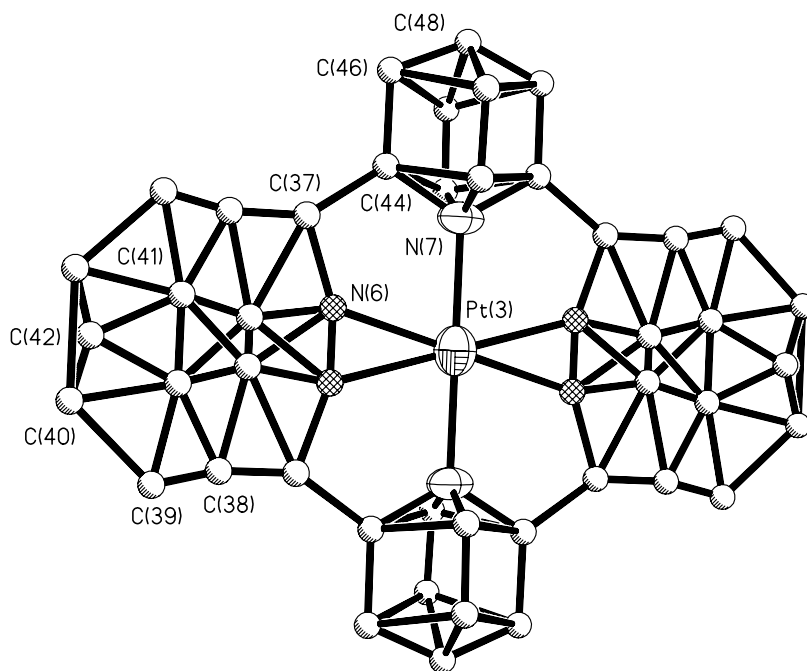

## HOMO (left) and LUMO (right) orbitals of compound 1

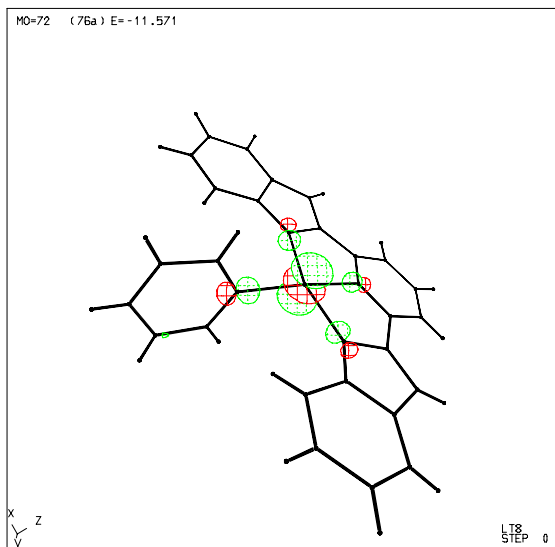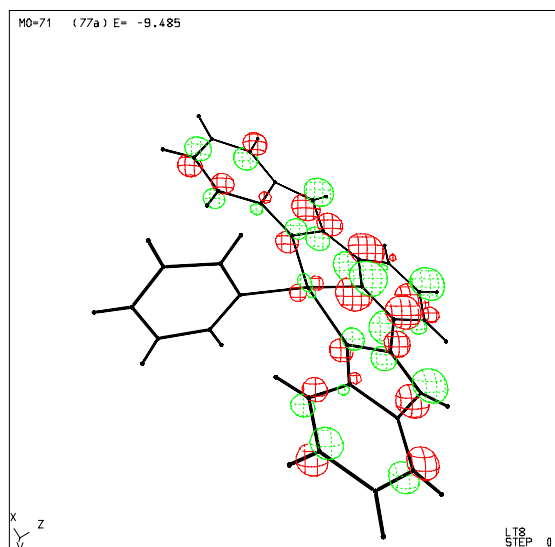

## HOMO (left) and LUMO (right) orbitals of compound 2

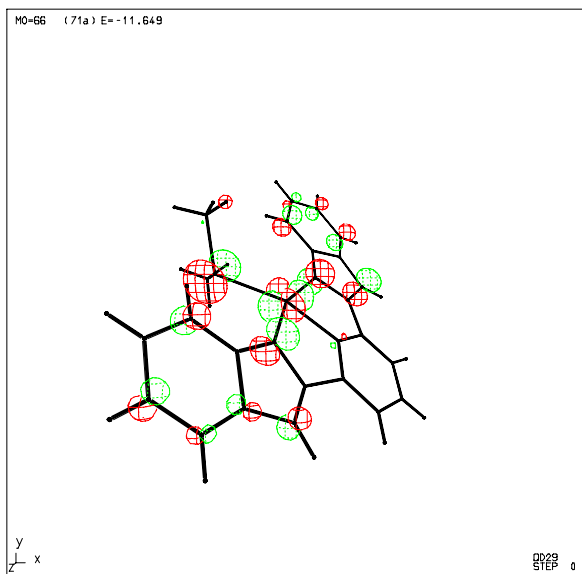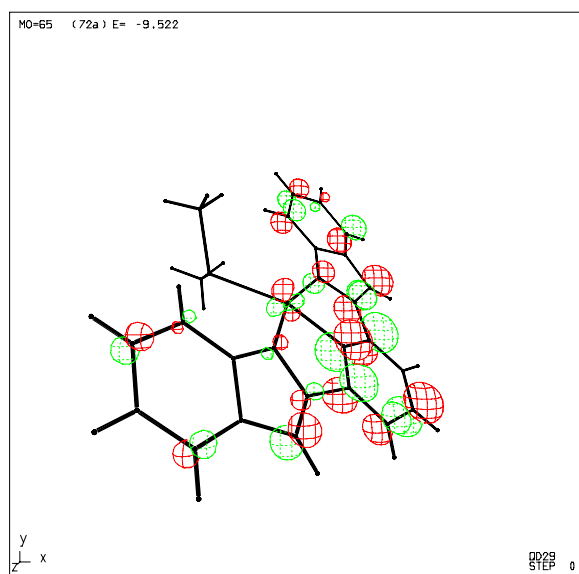

### LUMO (left) and HOMO (right) orbitals of compound 3

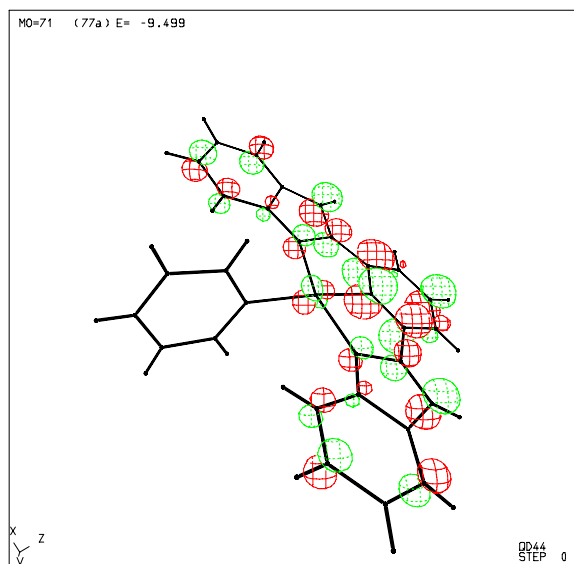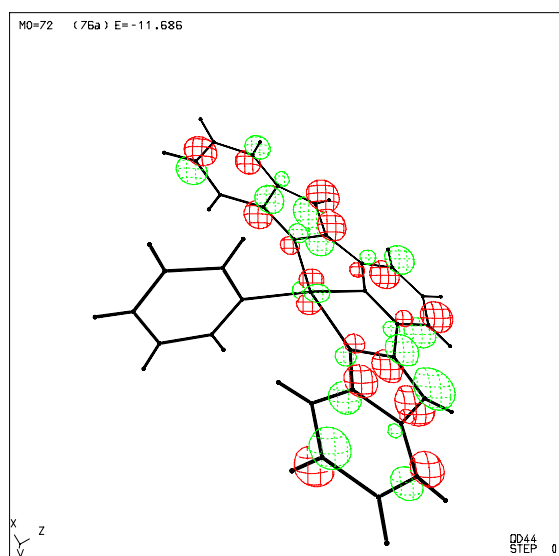

Supplement: b201951e.pdf [file b201951e.pdf]
